# Supplementary material for: The Role of CPNE7 (Copine-7) in Colorectal Cancer Prognosis and Metastasis
Source: MDPI journal article supplement (doi:10.3390/ijms242316704), 2023-11-24
Supplement: s1 [file s1]

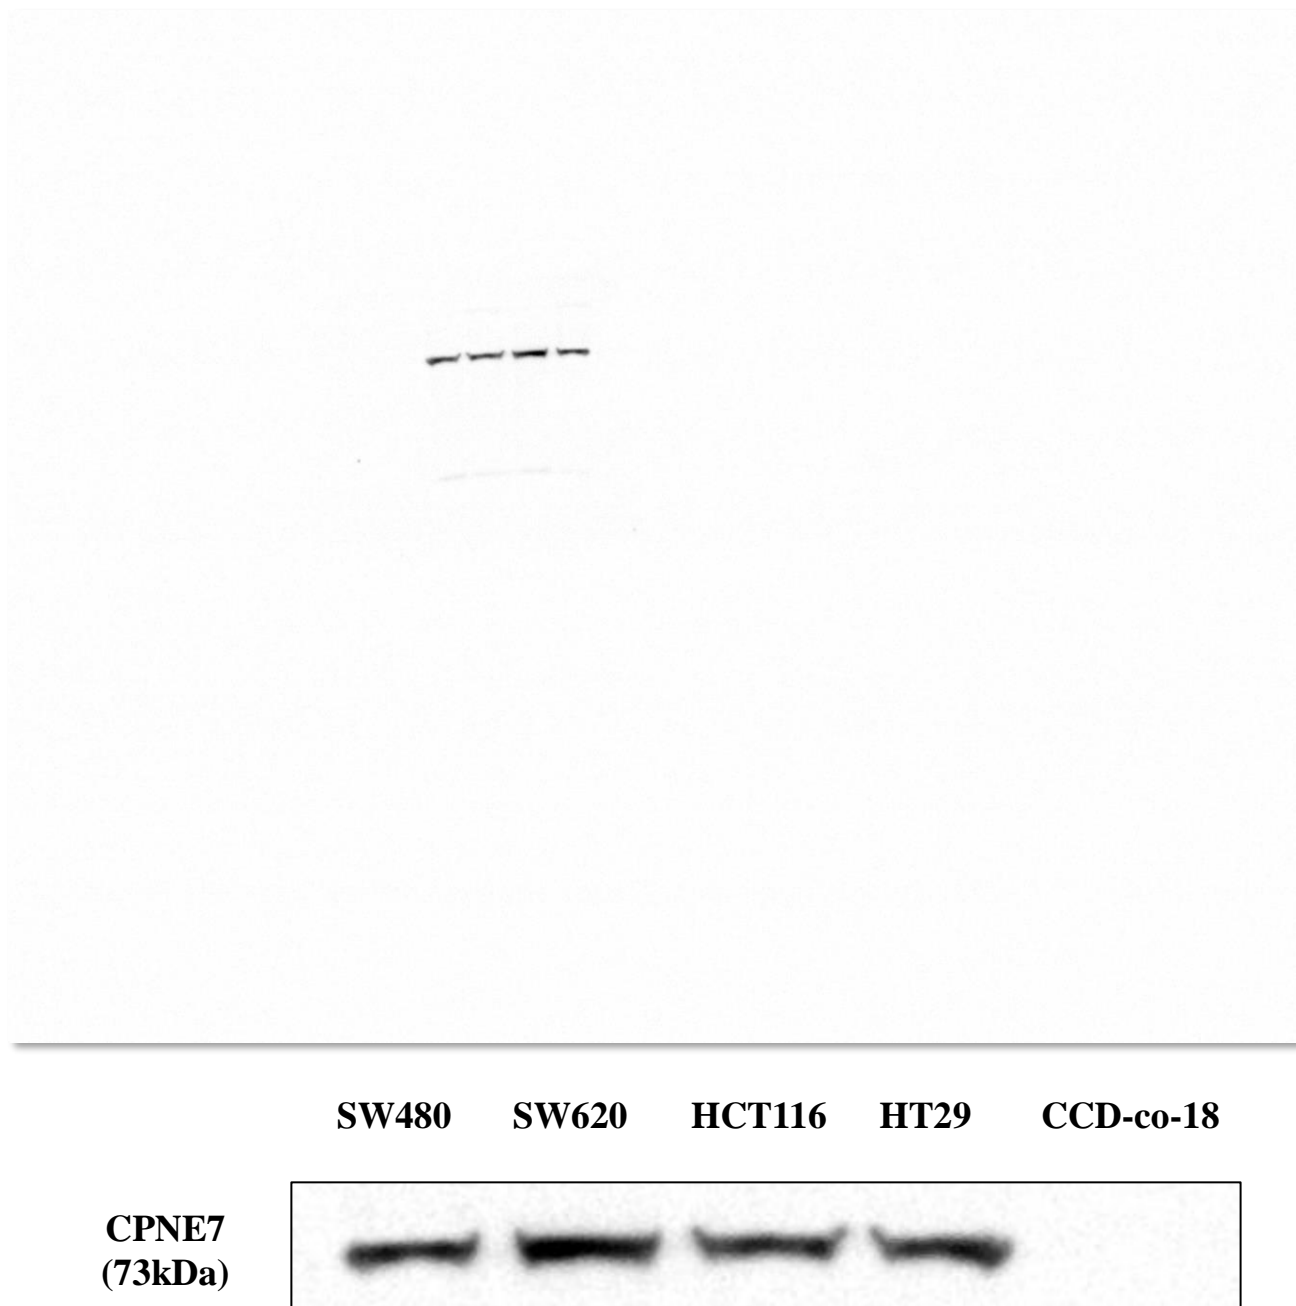

**Supplementary Figure S1.** Western blot of the fig.1-B. The *CPNE7* protein expression level by western blot in five cell lines. (SW480; colon adenocarcinoma, SW620; colorectal carcinoma, HCT116; colorectal carcinoma, HT29; colon adenocarcinoma, DLD1; colon adenocarcinoma, CCD-18-co; colon normal fibroblast.)

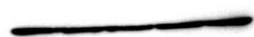

SW480

SW620

HCT116

HT29

CCD-co-18

$\beta$  -actin  
(42kDa)

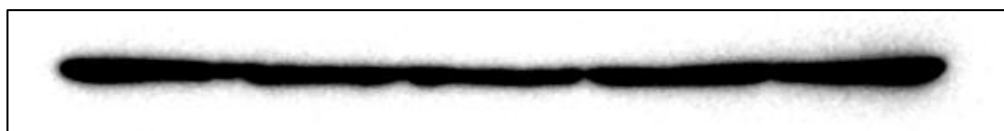

**Supplementary Figure S2.** Western blot of the fig.1-B.

The  $\beta$ -actin protein expression level by western blot in five cell lines .

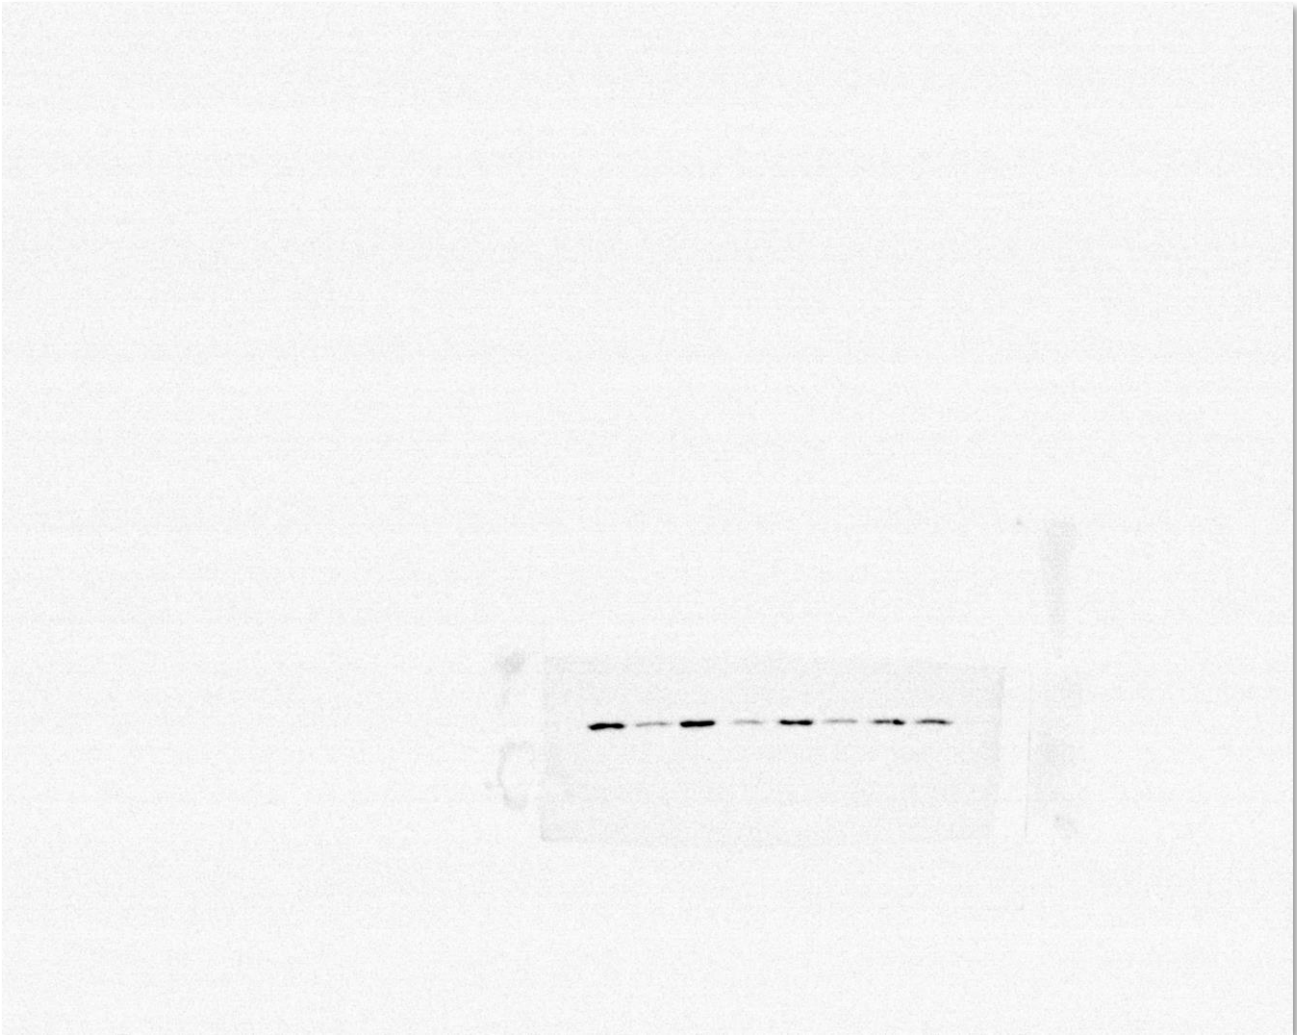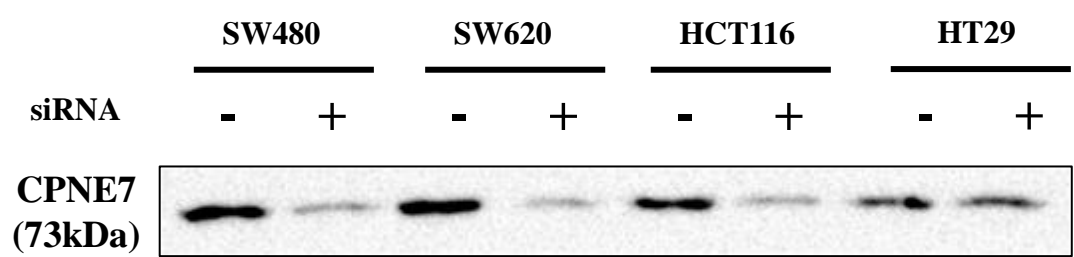

**Supplementary Figure S3.** Western blot of the fig.2-B. Identify the effects of *CPNE7* siRNA transfection through Western blotting.

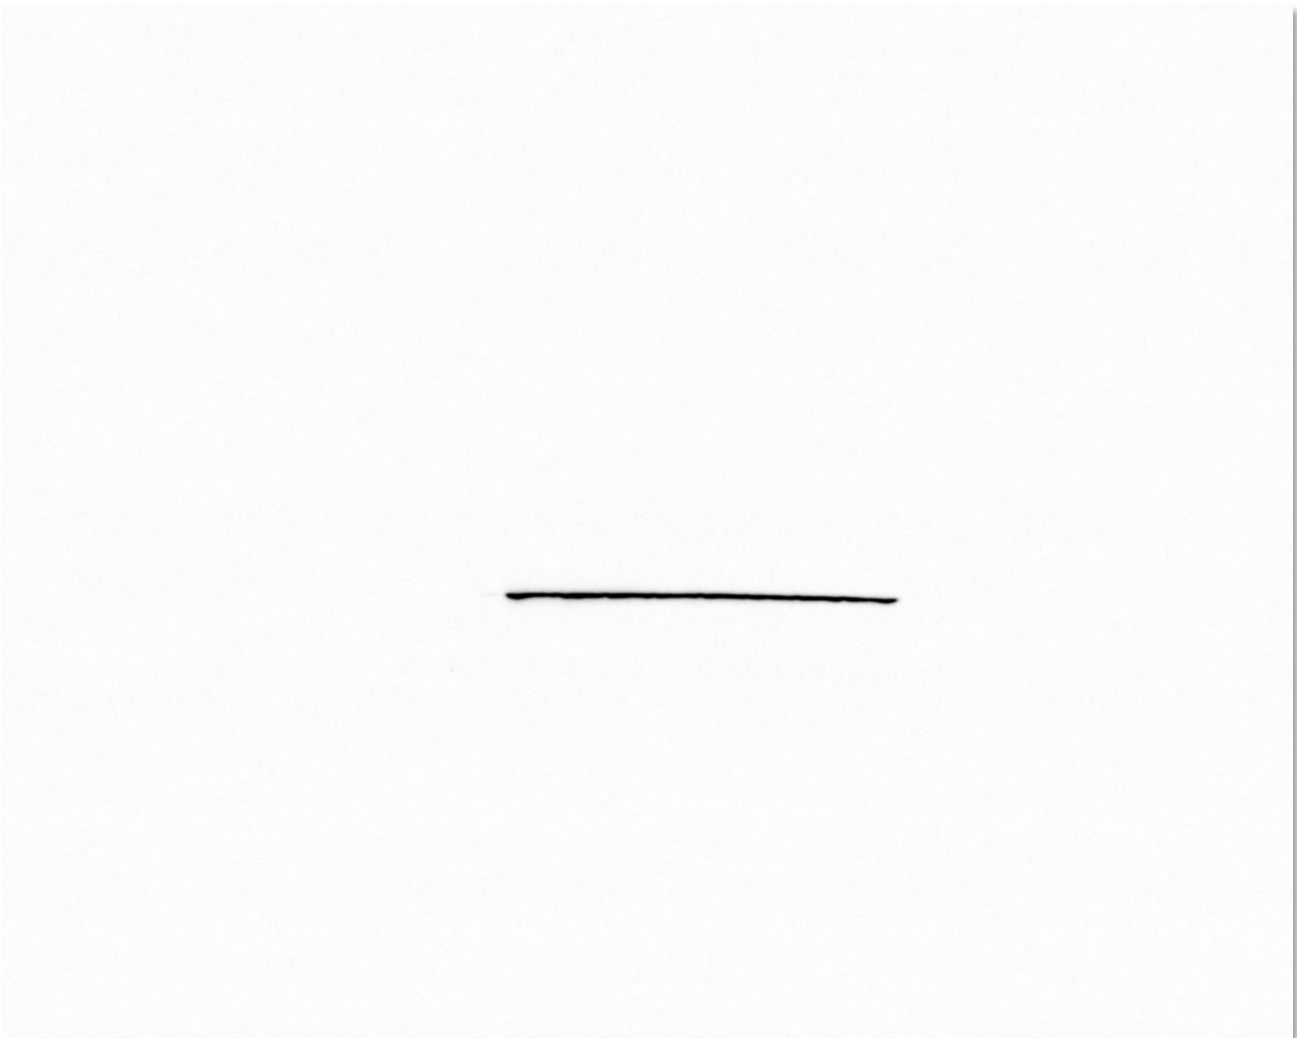

|                           | SW480 |   | SW620 |   | HCT116 |   | HT29 |   |
|---------------------------|-------|---|-------|---|--------|---|------|---|
| siRNA                     | -     | + | -     | + | -      | + | -    | + |
| $\beta$ -actin<br>(42kDa) |       |   |       |   |        |   |      |   |

**Supplementary Figure S4.** Western blot of the fig.2-B.  *$\beta$ -actin* expression was assessed by Western blot in four CRC cell lines and in each cell line infected with *CPNE7* siRNA.

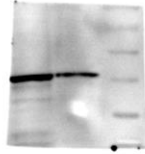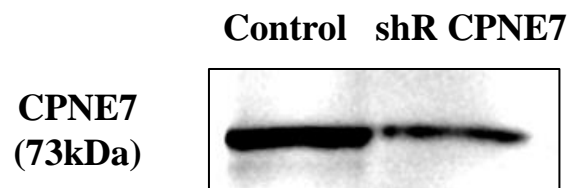

**Supplementary Figure S5.** Western blot of the fig.3-A. Identify the effects of *CPNE7* siRNA transfection through Western blotting.

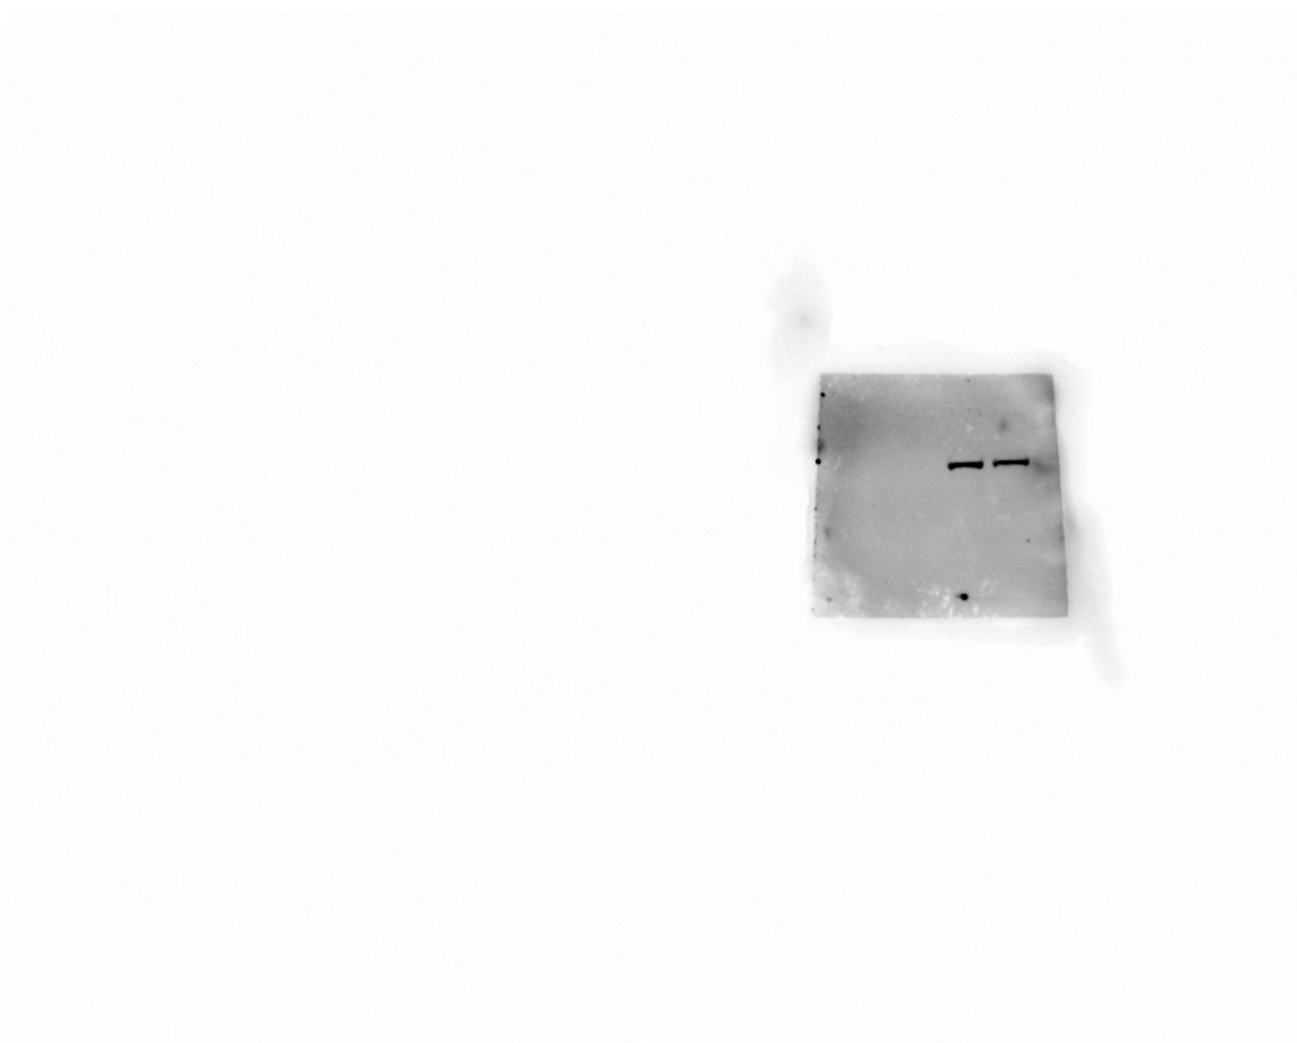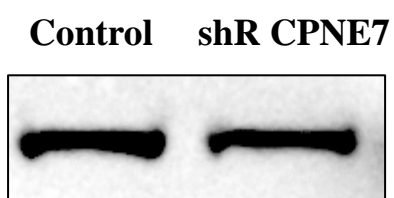

**Supplementary Figure S6.** Western blot of the fig.3-A. *β-actin* expression was assessed by Western blot in SW480 and in cell line infected with *CPNE7* shRNA.
